# Supplementary material for: Prevalence of Plasmodium parasitaemia in blood donors and a survey of the knowledge, attitude and practices of transfusion malaria among health workers in a hospital in Kumasi, Ghana
Source: PubMed Central journal article supplement (PMC6218034; doi:10.1371/journal.pone.0206303), 2018-11-05
Supplement: pone.0206303.s001.pdf [file pone.0206303.s001.pdf]

## **QUESTIONNAIRES FOR MEDICAL STAFFS ON TRANSFUSION TRANSMITTED**

### **MALARIA**

#### **Section A**

(SOCIO-DEMOGRAPHICS).

i) **Gender:** Male [  ] Female [  ]

ii) **Age:** 20-30 [  ] 31-40 [  ] 41-50 [  ] 51- 60 [  ] 61 and above [  ]

iii). **Job Category**

Medical Director [  ] Doctor [  ] Pharmacist [  ] Biomedical Scientist [  ] v)

Laboratory Technician [  ] Nurse [  ] Midwives [  ]

Physician Assistant [  ] Other (specify).....

#### **1 (HEALTH WORKERS KNOWLEDGE ABOUT TRANSFUSION TRANSMITTED**

#### **MALARIA (TTM)).**

i) **Have you heard of TTM?** YES [  ] NO [  ]

**If YES, please proceed to answer question 1(ii) to 1(vii), if NO, please skip to questions under (2)**

ii) **Can one acquire malaria through blood transfusion?** YES [  ] NO [  ] NOT SURE [  ]

iii) **Is TTM a serious and life threatening disease?** YES [  ] NO [  ] NOT SURE [  ]

iv) **Does every patient/recipient stand a risk of acquiring malaria through blood transfusion?** YES [ ] NO [ ] NOT SURE [ ]

v) **If yes, who are the most at risk group for TTM?**  
Infants [ ] Children below 5 years [ ] Pregnant women [ ] Travelers [ ]  
Patients with HIV/AIDS [ ] Everyone [ ] None immune- migrants [ ]  
Other(Specify).....

**If no, can you state why?**

.....  
.....

vi) **Does your blood bank screen donor blood for Transfusion Transmitted infections including malaria** YES [ ] NO [ ] NOT SURE [ ]

vii) **Will eliminating malaria parasites in blood donors help curtail the number of malaria cases in Ghana?** YES [ ] NO [ ] NOT SURE [ ]

**If YES, which of the following ways will consider the best for reducing TTM ?**

Donor deferral and Specific antimalarial immunoglobulin screening [ ]

Specific donor questioning [ ]

Administration of anti-malaria drugs to transfusion [ ]

Other(specify).....

**2 (ATTITUDES AND PRACTISES TOWARD TRANSFUSION TRANSMITTED  
MALARIA OF HEALTH WORKERS.)**

i) **Is malaria screening prior to blood donation necessary in Ghana?** YES[ ] NO[ ]  
NOT SURE[ ] SURE[ ]

ii) **Will you transfuse the following positive transmissible infections in case of emergency?**

SYPHILIS YES[ ] NO[ ] NOT SURE[ ] HEPATITIS B YES[ ] NO[ ] NOT SURE[ ]

HIV YES[ ] NO[ ] NOT SURE[ ] MALARIA YES[ ] NO[ ] NOT SURE[ ]

iii) **If NO for syphilis, state why**

There is no vaccine[ ] It has no cure[ ] High mortality[ ] Against Medical Practice [ ]

Severe complications[ ] Don't know for certain but I won't[ ]

Other (specify) .....

**If YES for syphilis state why**

It's safe to transfuse [ ] It's not fatal [ ] Its not part of the well known transfusion transmitted

Infections [ ] It's easy to treat [ ] It has a vaccine [ ] Don't know for certain but I

will[ ] Other( specify)[ ].....

vi) **If NO for Hepatitis B state why**

There is no vaccine[ ] It has no cure[ ] High mortality[ ] Against Medical Practice [ ]

Severe complications[ ] Don't know for certain but I won't[ ]

Other (specify) .....

**If YES for Hepatitis B state why**

It's safe to transfuse [ ] It's not fatal [ ] Its not part of the well known transfusion transmitted

Infections [ ] It's easy to treat [ ] It has a vaccine [ ] Don't know for certain but I

will[ ] Other( specify)[ ].....

**v) If NO for malaria state why**

There is no vaccine[ ] It has no cure[ ] High mortality[ ] Against Medical Practice [ ]

Severe complications[ ] Don't know for certain but I won't[ ]

Other (specify) .....

**If YES for malaria state why**

It's safe to transfuse [ ] It's not fatal [ ] Its not part of the well known transfusion transmitted

Infections [ ] It's easy to treat [ ] It has a vaccine [ ] Don't know for certain but I

will[ ] Other( specify)[ ].....

**vi) Have you treated a patient believed to be suffering from post-transfusion diseases with regards to TTM? YES [ ] NO [ ] NOT SURE[ ] NOT APPLICABLE[ ]**

**If Yes, what were the symptoms?**

Chills[ ] Fever[ ] Sweating[ ] Headache[ ] Vomiting[ ] Others

(specify).....

**v) Which of the following methods would you consider advisable for screening malaria parasites in blood donor's prior transfusion?**

Microscopy[ ] Polymerase Chain Reaction[ ] Rapid Diagnostic Test[ ]

Enzyme Immunoassay[ ] Other (specify).....

**vi)Which of the following properties will you consider in choosing your answer in (v)**

High sensitivity[ ] low sensitivity[ ] High specificity[ ] low specificity[ ] Easy to operate[ ]

Economic[ ]
